# Supplementary material for: Association of miR-146a-5p and miR-21-5p with Prognostic Features in Melanomas
Source: MDPI journal article supplement (doi:10.3390/cancers16091688), 2024-04-26
Supplement: s1 [file s1]

Supplementary Figure Legend:

**Figure S1. Correlation analysis of combined and individual miRNA expression with Breslow thickness (BT) in nodular melanoma (NM) and in lentigo maligna melanoma (LMM) subtypes.**

Figures show the distribution of paired combined and individual miRNA values and BT values. The correlation in NM (A) and in LMM (B) is not significant. Simple linear regression line is shown.

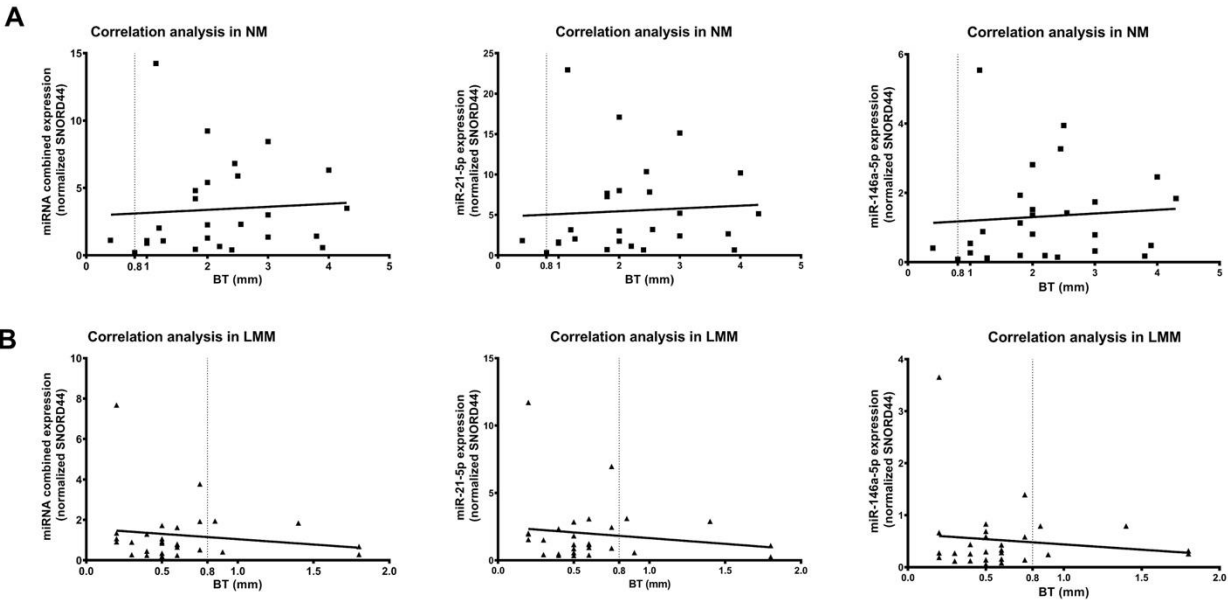

**Figure S2. Association of combined and individual miR-21-5p and miR-146a-5p expression with prognostic parameters in CM histological subtypes**

Figures show the scatter plot distribution of combined miRNA expression and individual miR-21-5p and miR-146a-5p in superficial spreading melanomas (SSM), nodular melanoma (NM) and lentigo maligna melanoma (LMM) based on Breslow thickness (BT) (A), ulceration status (B) and mitotic rate (C). Figures D show the scatter plot distribution of combined miRNA expression and individual miR-21-5p and miR-146a-5p in all melanomas (CM), SSM and NM based on regression status.

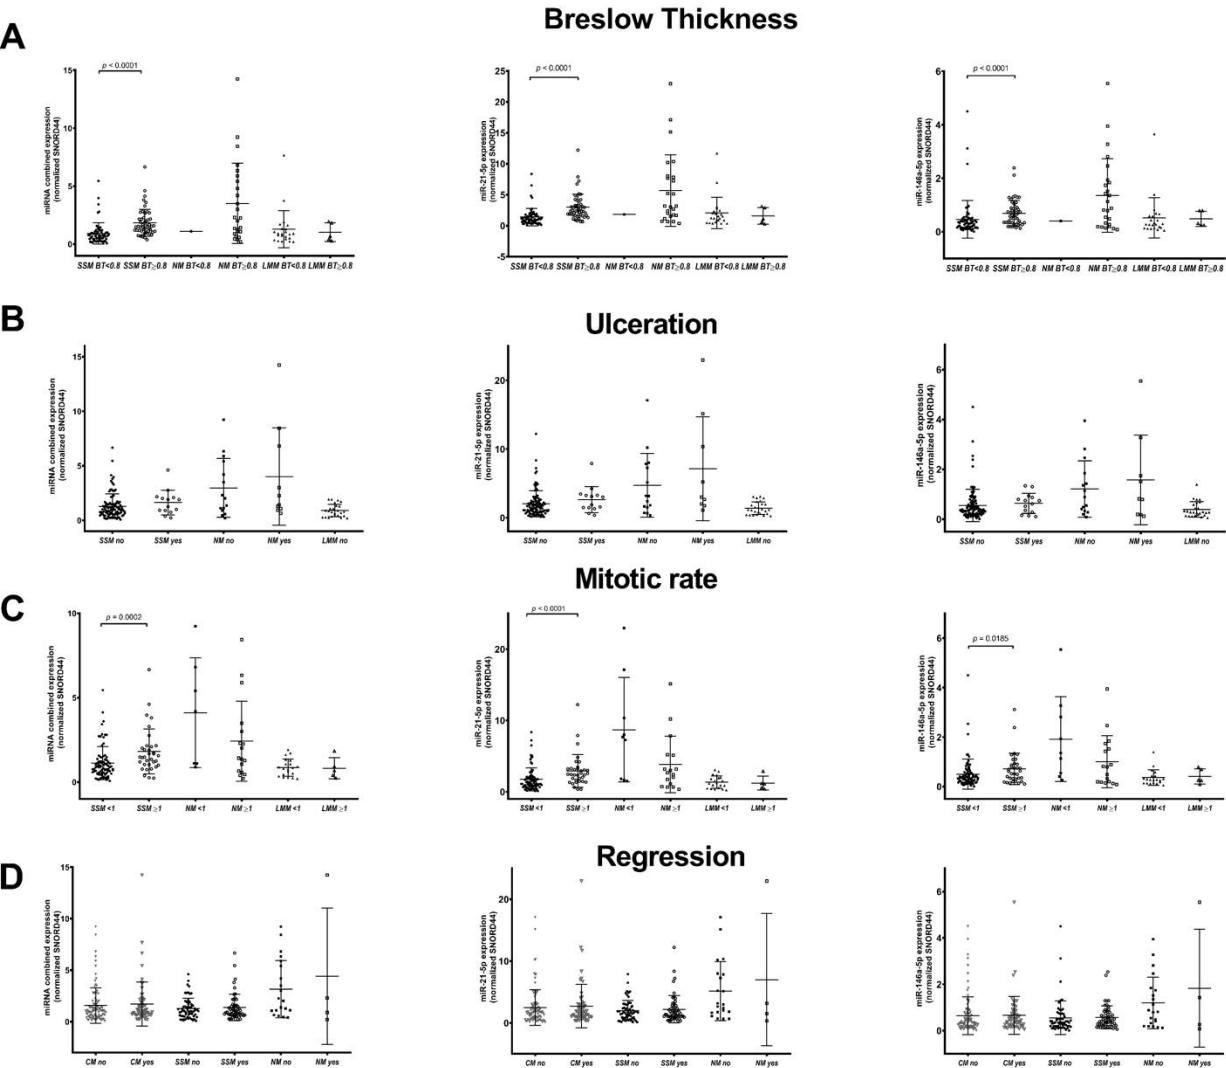

**Figure S3. Kaplan-Meier plots for overall survival (OS) and time-to-relapse (TTR) in mitotic rate and regression groups.**

(A) The plots show a significantly worse OS and TTR curves in patients with  $\geq 1$  mitosis/mm<sup>2</sup> compared to patients with  $< 1$  mitosis/mm<sup>2</sup>. (B) The plots show no statistically different OS and TTR curves in patients grouped based on regression status

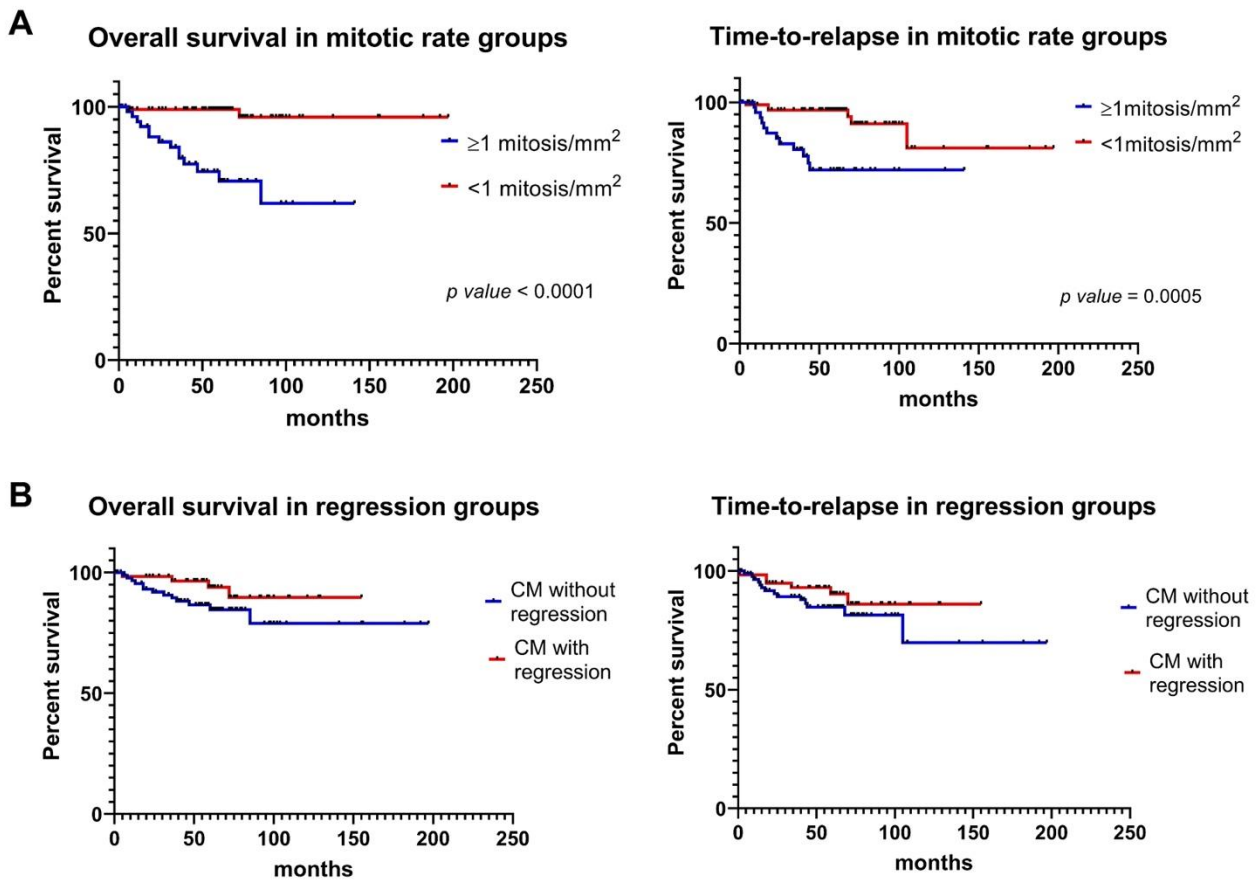

#### Breslow classification

| T category | Breslow Thickness | Ulceration status          |
|------------|-------------------|----------------------------|
| TX         | N/A               | N/A                        |
| Tis        | N/A               | N/A                        |
| T1         | $\leq 1.0$ mm     | Unknown or unspecified     |
| T1a        | $< 0.8$ mm        | Without ulceration         |
| T1b        | $< 0.8$ mm        | With ulceration            |
|            | $0.8-1.0$ mm      | With or without ulceration |
| T2         | $> 1.0-2.0$ mm    | Unknown or unspecified     |
| T2a        | $> 1.0-2.0$ mm    | Without ulceration         |
| T2b        | $> 1.0-2.0$ mm    | With ulceration            |
| T3         | $> 2.0-4.0$ mm    | Unknown or unspecified     |
| T3a        | $> 2.0-4.0$ mm    | Without ulceration         |
| T3b        | $> 2.0-4.0$ mm    | With ulceration            |

|     |         |                        |
|-----|---------|------------------------|
| T4  | >4.0 mm | Unknown or unspecified |
| T4a | >4.0 mm | Without ulceration     |
| T4b | >4.0 mm | With ulceration        |

The original and primary source is the AJCC Cancer Staging Manual, 8th Edition (2017), published by Springer International Publishing (Gershenwald JE, Scolyer RA, Hess KR, et al. Melanoma of the Skin. In: Amin AB, Edge SB, Greene, FL, et al. (Eds). AJCC Cancer Staging Manual. 8th Ed. New York: Springer; 2017:563–585).

### **Clark levels of skin cancer.**

In Clark Level I, the cancer is in the epidermis only.

In Clark Level II, the cancer has begun to spread into the papillary dermis (upper layer of the dermis).

In Clark Level III, the cancer has spread through the papillary dermis into the papillary-reticular dermal interface but not into the reticular dermis (lower layer of the dermis).

In Clark Level IV, the cancer has spread into the reticular dermis.

In Clark Level V, the cancer has spread into the subcutaneous tissue.
